# Supplementary material for: Facile dynamic one-step modular assembly based on boronic acid-diol for construction of a micellar drug delivery system
Source: Royal Society of Chemistry journal article supplement (doi:10.1039/c8bm00712h), 2018-01-01
Supplement: c8bm00712h1.pdf [file c8bm00712h1.pdf]

## Supporting Information

### Facile Dynamic One-Step Modular Assembly Based on Boronic Acid-Diol for Construction of Micellar Drug Delivery System

Zekai Zhao,<sup>1</sup> Ying Zhang,<sup>1</sup> Chunli Tian,<sup>1</sup> Tingjie Yin,<sup>\*,2</sup> Can Zhang<sup>\*,1</sup>

<sup>1</sup> State Key Laboratory of Natural Medicines and Jiangsu Key Laboratory of Drug Discovery for Metabolic Diseases, Center of Advanced Pharmaceuticals and Biomaterials, China Pharmaceutical University, Nanjing 210009, China

<sup>2</sup> State Key Laboratory of Natural Medicines, Department of Pharmaceutics, China Pharmaceutical University, 24 Tongji Xiang, Nanjing 210009, China

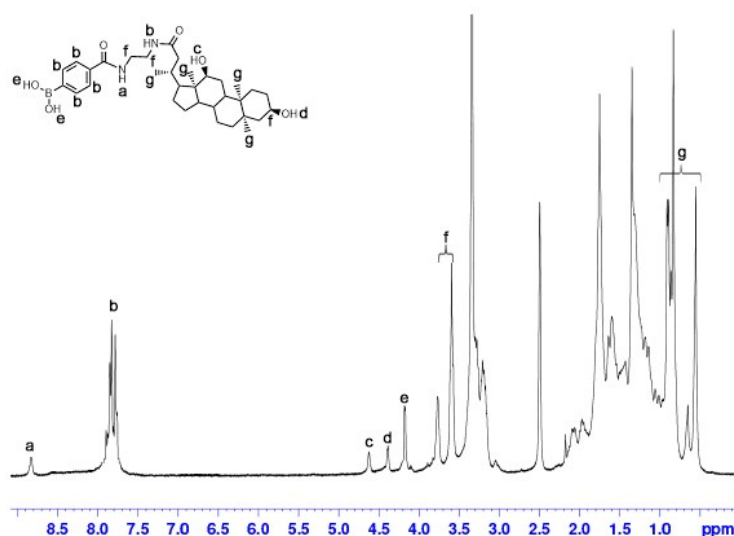

Fig. S1 The <sup>1</sup>H-NMR spectrum of PBA-DOCA in d<sup>6</sup>-DMSO.

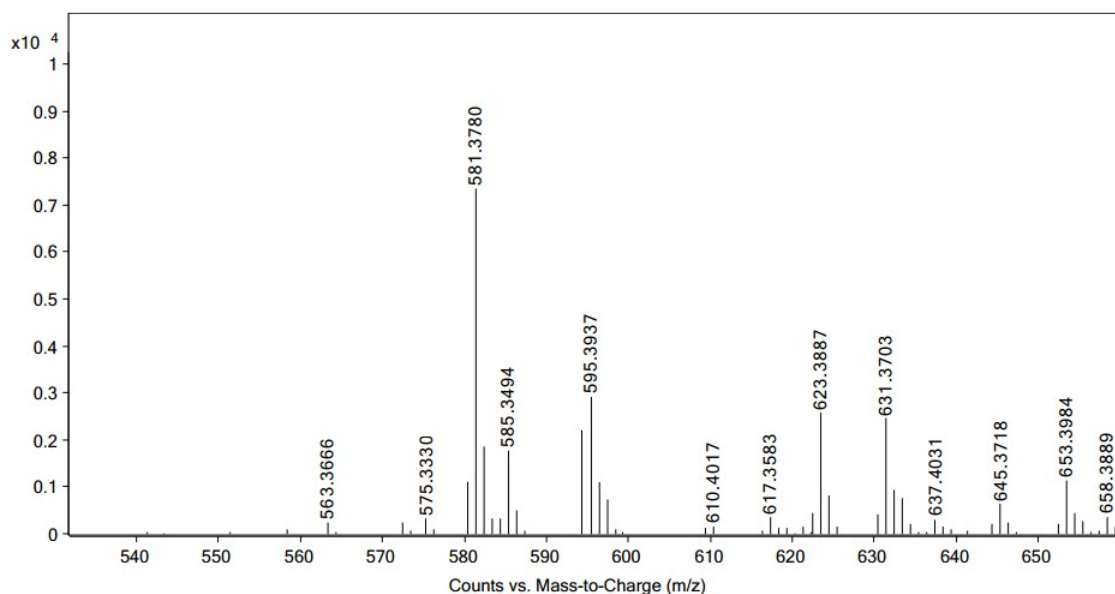

PBA-DOCA: HR-MS (ESI<sup>-</sup>) calcd for (C<sub>33</sub>H<sub>50</sub>BN<sub>2</sub>O<sub>6</sub>): 581.38; found: 581.3780.

Fig. S2 The HR-MS result of PBA-DOCA.

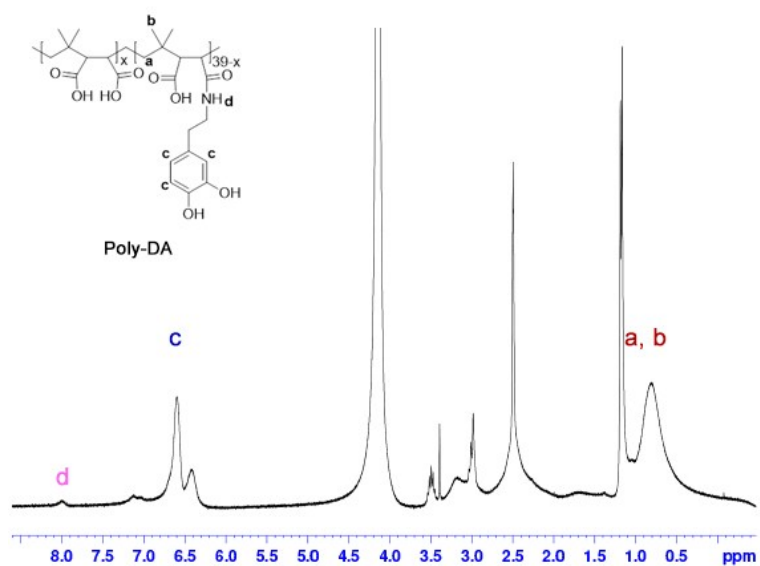

Fig. S3 The <sup>1</sup>H-NMR spectrum of Poly-DOCA in D<sub>2</sub>O.

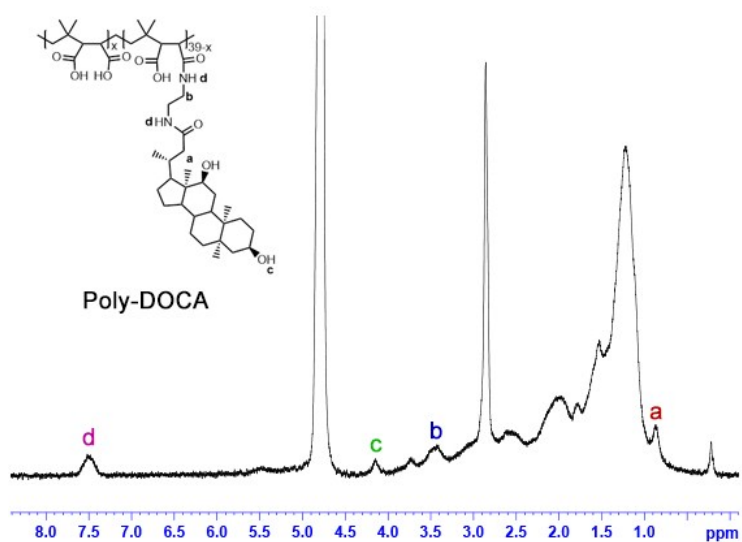

Fig. S4 The <sup>1</sup>H-NMR spectrum of Poly-DOCA in the mixture of d<sup>6</sup>-DMSO and D<sub>2</sub>O.
